# Supplementary material
Source: PubMed Central journal article supplement (PMC6801101)
Supplement: NIHMS1538587-supplement-2.pdf [file NIHMS1538587-supplement-2.pdf]

**A**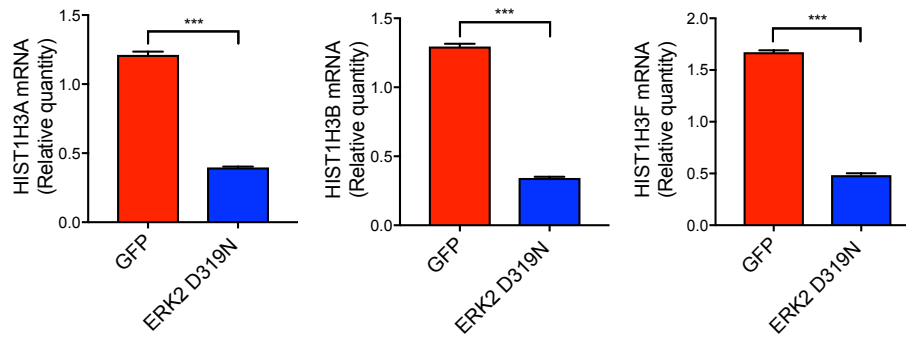**B**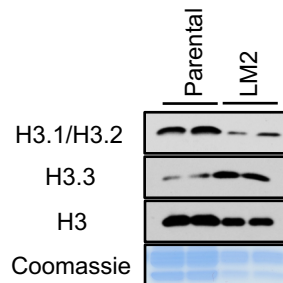

**Figure S1. mRNA of canonical H3 histones is reduced by metastatic signaling (related to Figure 1)**

(A) mRNA levels of H3.1 encoding genes *HIST1H3A*, *HIST1H3B* and *HIST1H3F* evaluated by qPCR in MCF-10A expressing ERK2 D319N inducibly for 3 days (n = 4). All values are expressed as mean  $\pm$  SEM (\*\*\*)p < 0.001).

(B) Levels of histone H3 variants in chromatin extracts and Coomassie Blue stain of total histones in histone extracts of the MDA-MB-231 parental versus the more metastatic LM2 clone; representative images (n = 4).

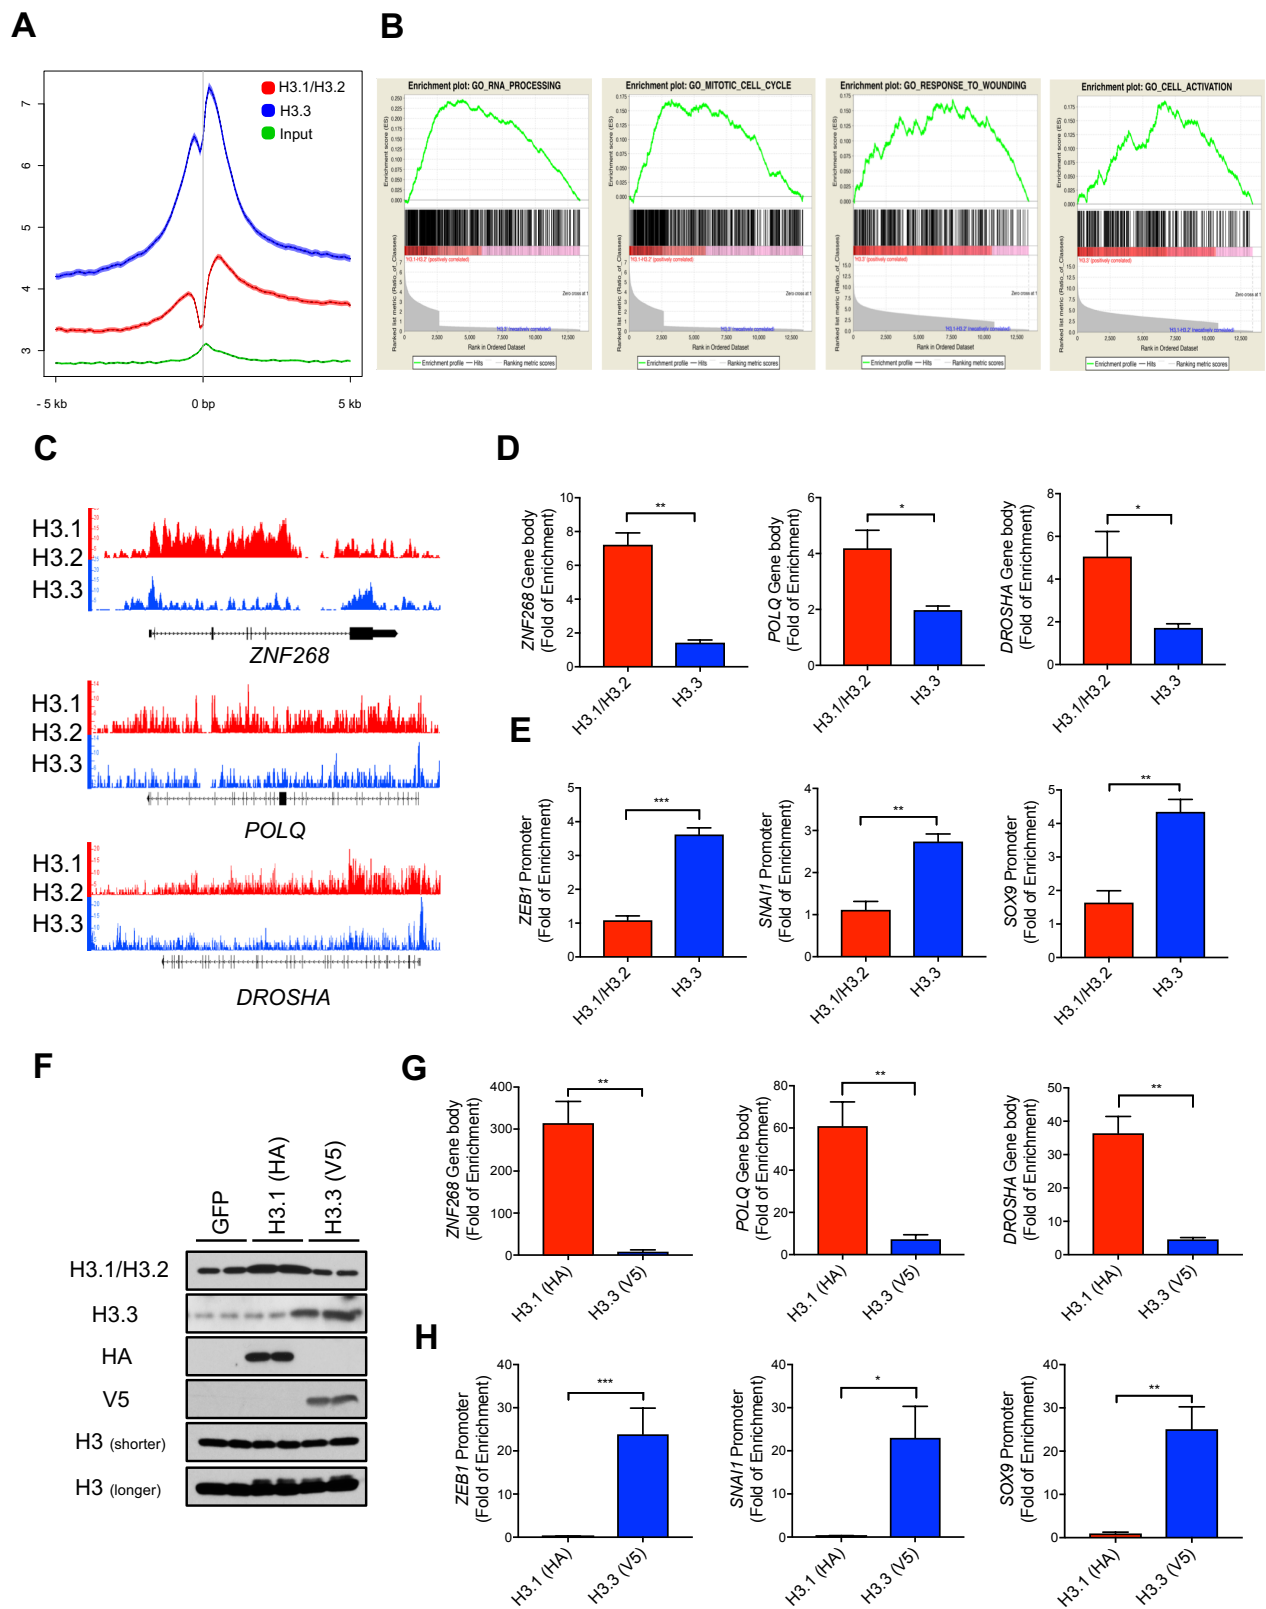

**Figure S2. Histone H3 variants regulate distinct genetic programs in metastatic cells (related to Figure 2)**

(A-C) Summary of H3.1/H3.2 and H3.3 ChIP-seq analysis in LM2 cells displayed as: an average plot of H3.1/H3.2 and H3.3 distribution across transcriptional starting sites (TSS) (A), GSEA

enrichment plots evaluating H3.1/H3.2 enrichment in GO-term gene sets for RNA processing and mitotic cell cycle, and H3.3 enrichment in GO-term gene sets for response to wounding and cell activation (B), H3.1/H3.2 and H3.3 signal tracks for genes *ZNF257*, *POLQ* and *DROSHA* (C). (D and E) Validation of the H3.1/H3.2 ChIP-seq top targets *ZNF268*, *POLQ* and *DROSCHA* (D), and the H3.3 ChIP-seq top targets *ZEB1*, *SNAI1* and *SOX9* (E) by ChIP-qPCR in LM2 cells (n = 3). (F) Validation of antibody specificity for histone H3 variants in LM2 cells expressing a HA-tagged version of H3.1 or a V5-tagged version of H3.3; “shorter” and “longer” indicates shorter/longer film exposures, representative images (n = 4). (G and H) Validation of the H3.1/H3.2 ChIP-seq top targets *ZNF268*, *POLQ* and *DROSCHA* (G), and the H3.3 ChIP-seq top targets *ZEB1*, *SNAI1* and *SOX9* (H) by ChIP-qPCR in LM2 cells expressing a HA-tagged version of H3.1 or a V5-tagged version of H3.3 (n = 3). All values are expressed as mean ± SEM (\*p < 0.05, \*\*p < 0.01, \*\*\*p < 0.001).

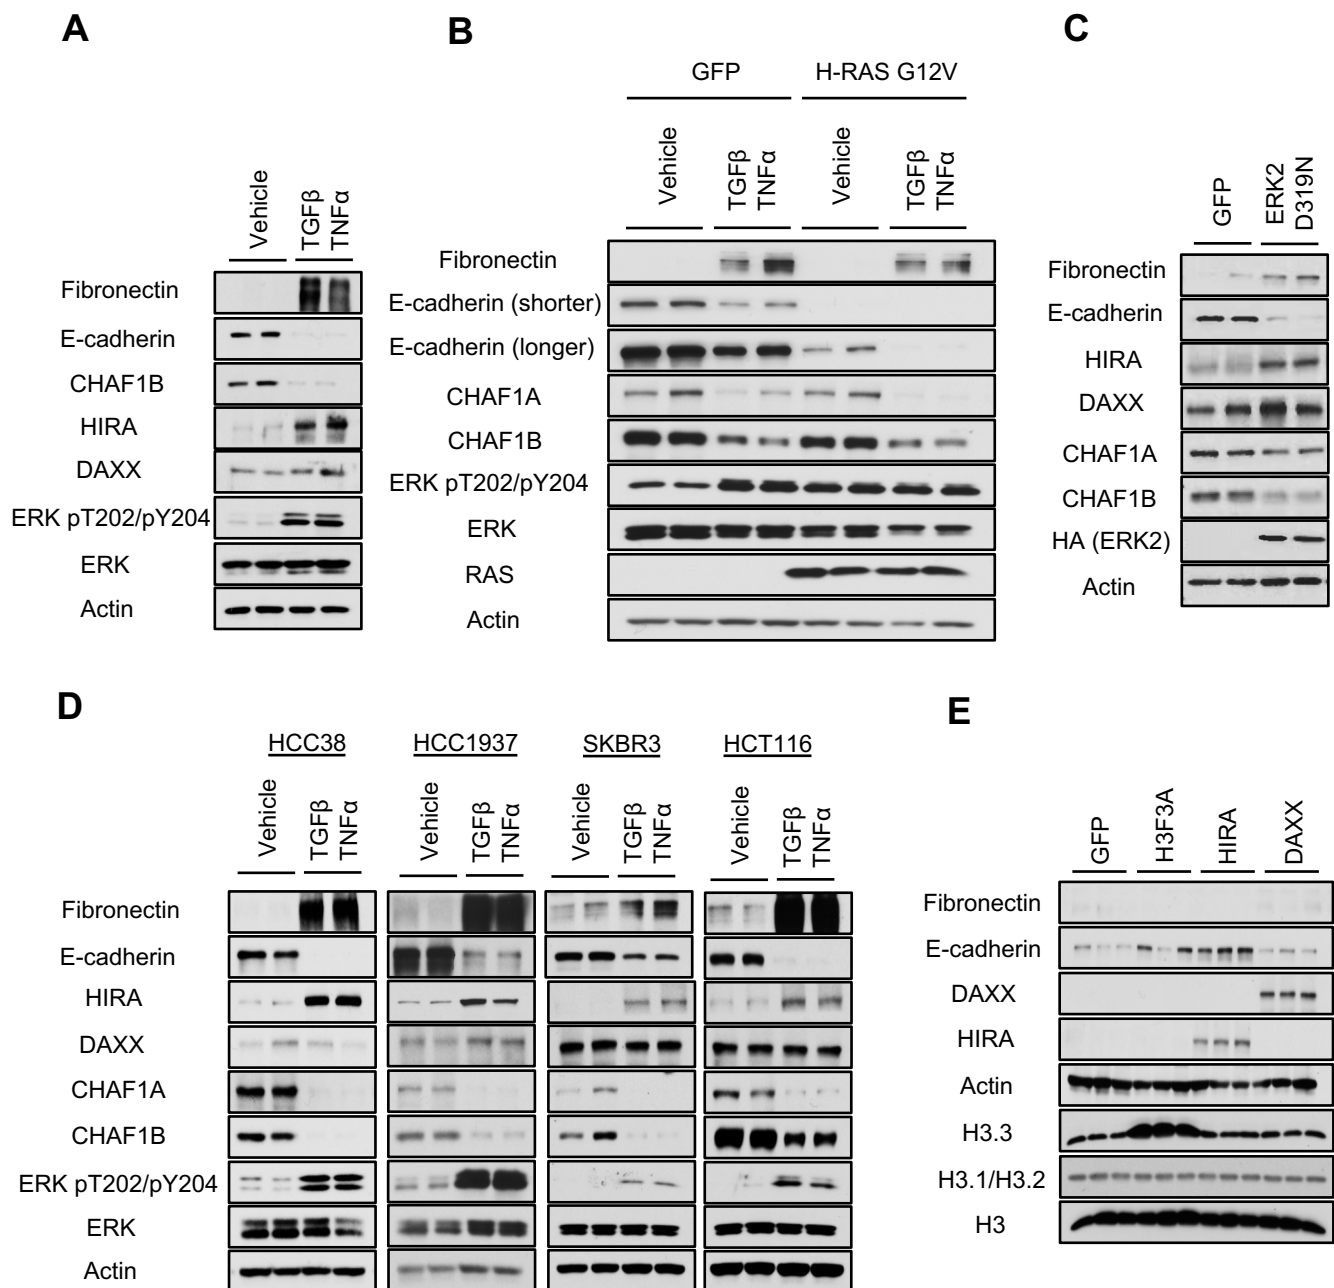

**Figure S3. Metastatic signaling suppresses the CAF-1 complex and increases HIRA in a variety of cell models (related to Figure 3)**

(A-D) Levels of the histone H3 chaperones in NMuMG with TGFβ + TNFα for 10 days (A), MCF-10A transformed by induction of oncogenic H-RAS and treated with TGFβ + TNFα for 5 days (B), MCF-10A expressing ERK2 D319N for 6 days after transduction (C), HCC38, HCC1937, SKBR3 and HCT116 treated with TGFβ + TNFα for 10 days (D); “shorter” and “longer” indicates shorter/longer film exposure, representative images (n = 4).

(E) EMT induction determined by the protein levels of the mesenchymal marker fibronectin and the epithelial marker E-cadherin after 14 days of expression of H3F3A or HIRA or DAXX in MCF-10A; representative images (n = 3).

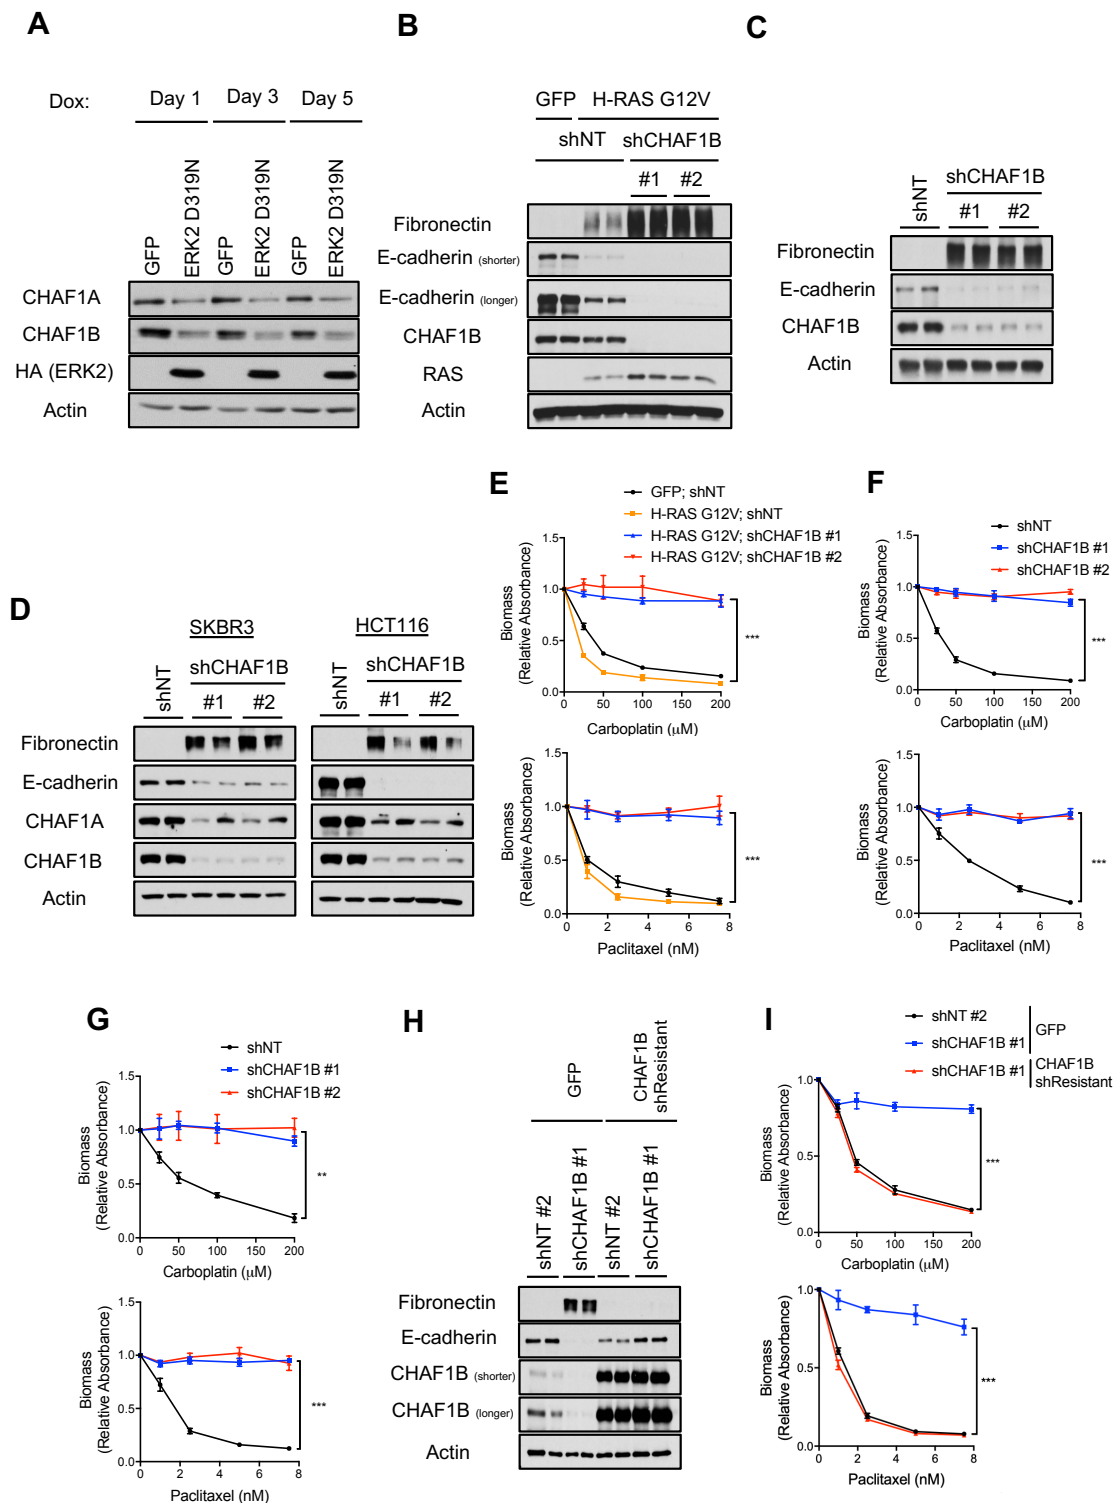

**Figure S4. Suppression of the CAF-1 complex promotes aggressiveness of cancer cells (related to Figure 4)**

(A) Time-course analysis of CAF-1 complex protein levels in MCF-10A expressing ERK2 D319N inducibly for 1, 3 or 5 days; representative images (n = 4).

(B-D) EMT induction determined by protein levels of the mesenchymal marker fibronectin and the epithelial marker E-cadherin in MCF-10A cells transformed by induction of oncogenic H-RAS and with CHAF1B knockdown for 5 days (B), NMuMG with CHAF1B knockdown for 10 days (C),

SKBR3 and HCT116 both with CHAF1B knockdown for 10 days (D); “shorter” and “longer” indicates shorter/longer film exposures, representative images (n = 4).

(E-G) Viability of MCF-10A cells transformed by induction of oncogenic H-RAS with CHAF1B knockdown for 5 days (E), SKBR3 with CHAF1B knockdown for 10 days (F), and HCT116 with CHAF1B knockdown for 10 days (G) treated with the chemotherapeutic drugs carboplatin and paclitaxel (n = 4).

(H) EMT induction determined by protein levels of the mesenchymal marker fibronectin and the epithelial marker E-cadherin in MCF-10A with CHAF1B knockdown and overexpression of a shRNA-resistant *CHAF1B* cDNA; representative images (n = 4).

(I) Viability of MCF-10A with CHAF1B knockdown and a shRNA-resistant CHAF1B cDNA treated with the chemotherapeutic drugs carboplatin and paclitaxel (n = 4).

All values are expressed as mean  $\pm$  SEM (\*\*p < 0.01, \*\*\*p < 0.001).

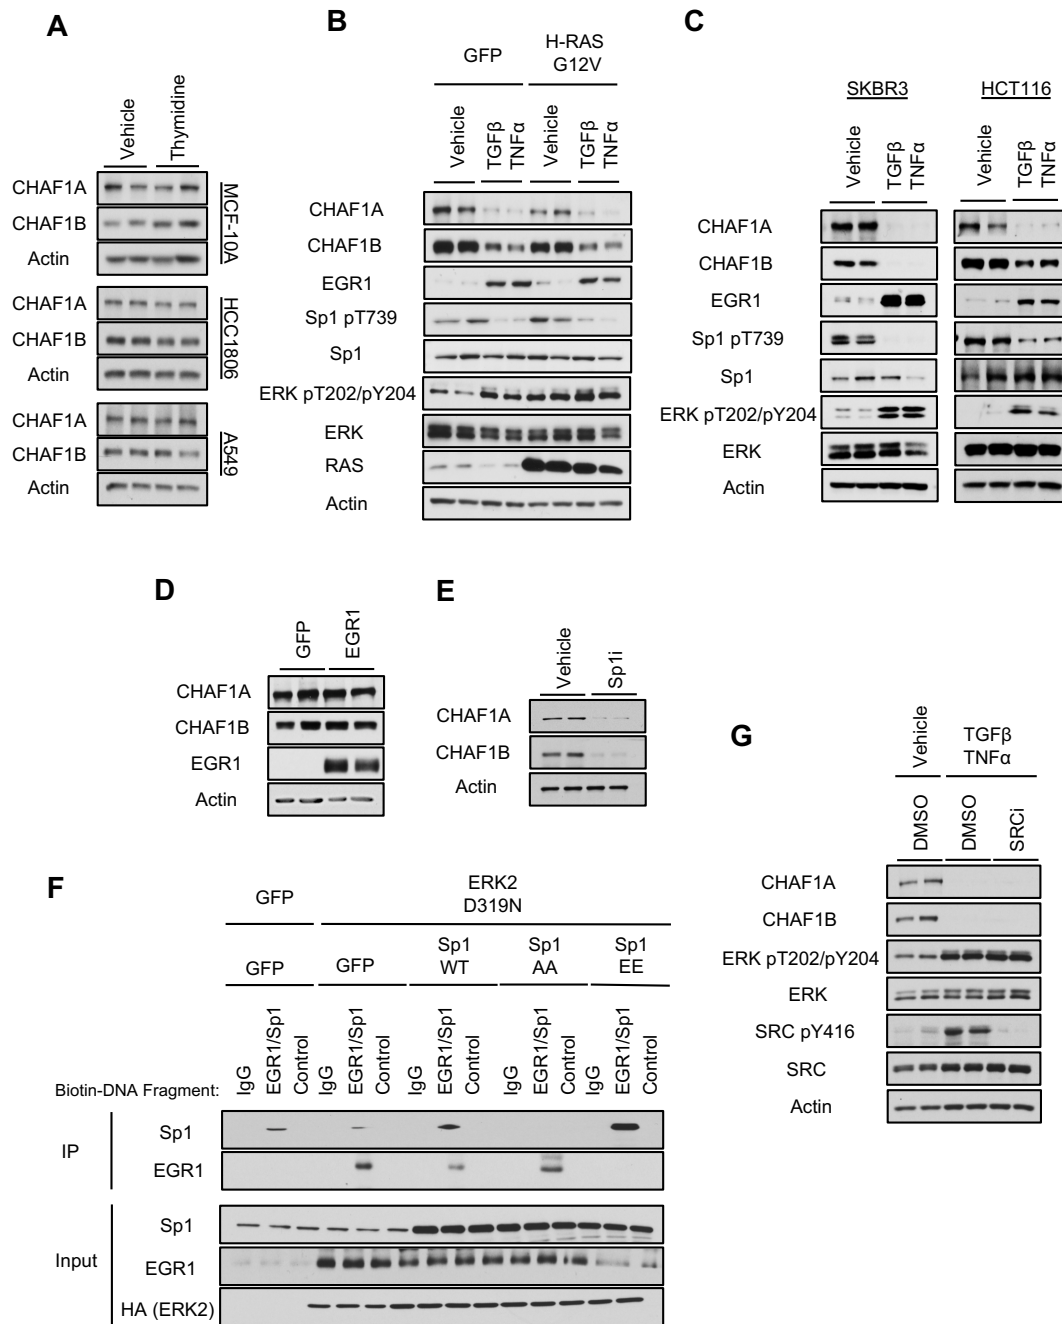

**Figure S5. CAF-1 levels are not acutely regulated by cell cycle or SRC activation (related to Figure 5)**

(A) CAF-1 complex protein levels in MCF-10A, HCC1806 and A549 treated with thymidine for 24 hours; representative images (n = 4).

(B and C) Protein levels of EGR1, Sp1 pT739 and ERK2 pT202/pY204 phosphorylation in MCF-10A cells transformed by induction of oncogenic H-RAS and treated with TGFβ + TNFα for 5 days (B), and SKBR3 and HCT116 treated with TGFβ + TNFα for 10 days (C); representative images (n = 4).

(D and E) CAF-1 complex protein levels in MCF-10A expressing EGR1 for 3 days (D), and MCF-10A treated with the Sp1 inhibitor mithramycin A for 24 hours (E); representative images (n = 4).

(F) Binding of Sp1 and/or EGR1 to biotinylated DNA fragments of either the CHAF1B promoter containing the overlapping Sp1/EGR1 site or a scrambled control in lysates from MCF-10A expressing inducible ERK2 D319N and either Sp1 WT or the Sp1 T453/T739 phosphorylation site mutants for 3 days; IgG control for the immunoprecipitation of the DNA fragments with streptavidin; representative images (n = 4).

(G) CAF-1 complex protein levels in MCF-10A treated with the SRC inhibitor KX2-391 and TGF $\beta$  + TNF $\alpha$  for 24 hours; representative images (n = 4).



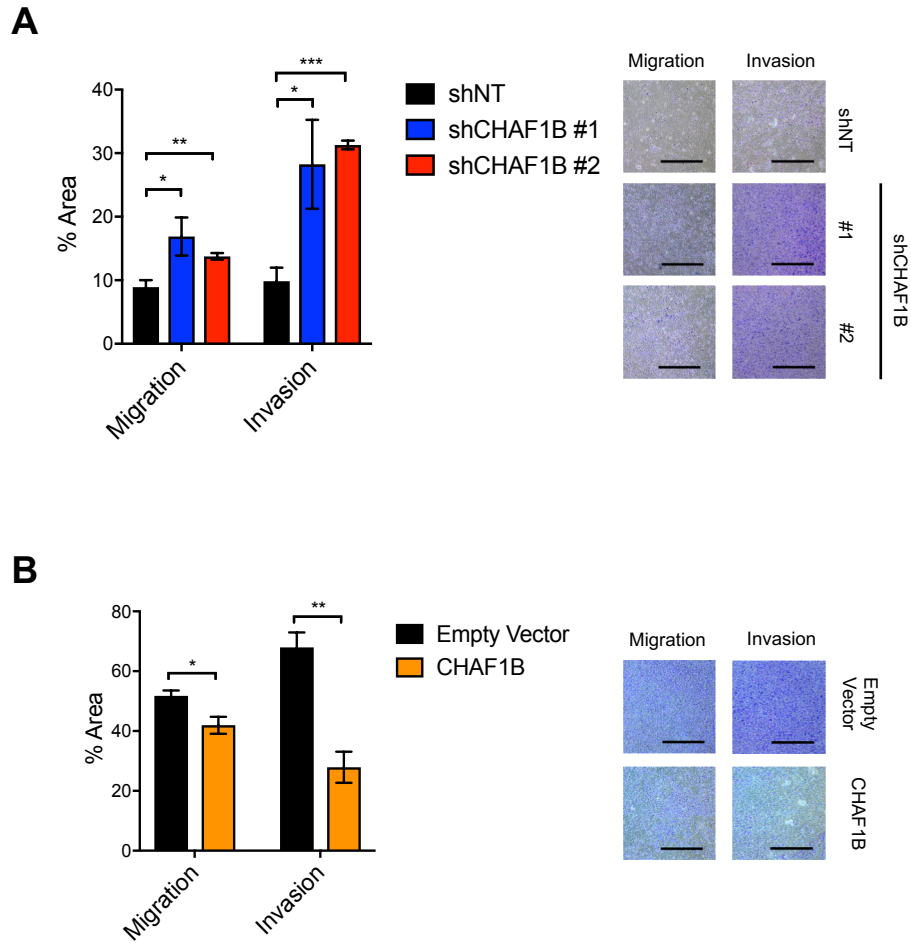

**Figure S6. CAF-1 levels dictates metastatic-like properties of cancer cells (related to Figure 6)**

(A and B) Quantification of migration and invasion of MDA-MB-231 parental cells with CHAF1B knockdown for 10 days (A), and LM2 overexpressing CHAF1B for 10 days (B) evaluated by transwell assays (left); representative images (right) ( $n = 4$ ), scale bar = 1 mm. All values are expressed as mean  $\pm$  SEM (\* $p < 0.05$ , \*\* $p < 0.01$ , \*\*\* $p < 0.001$ ).

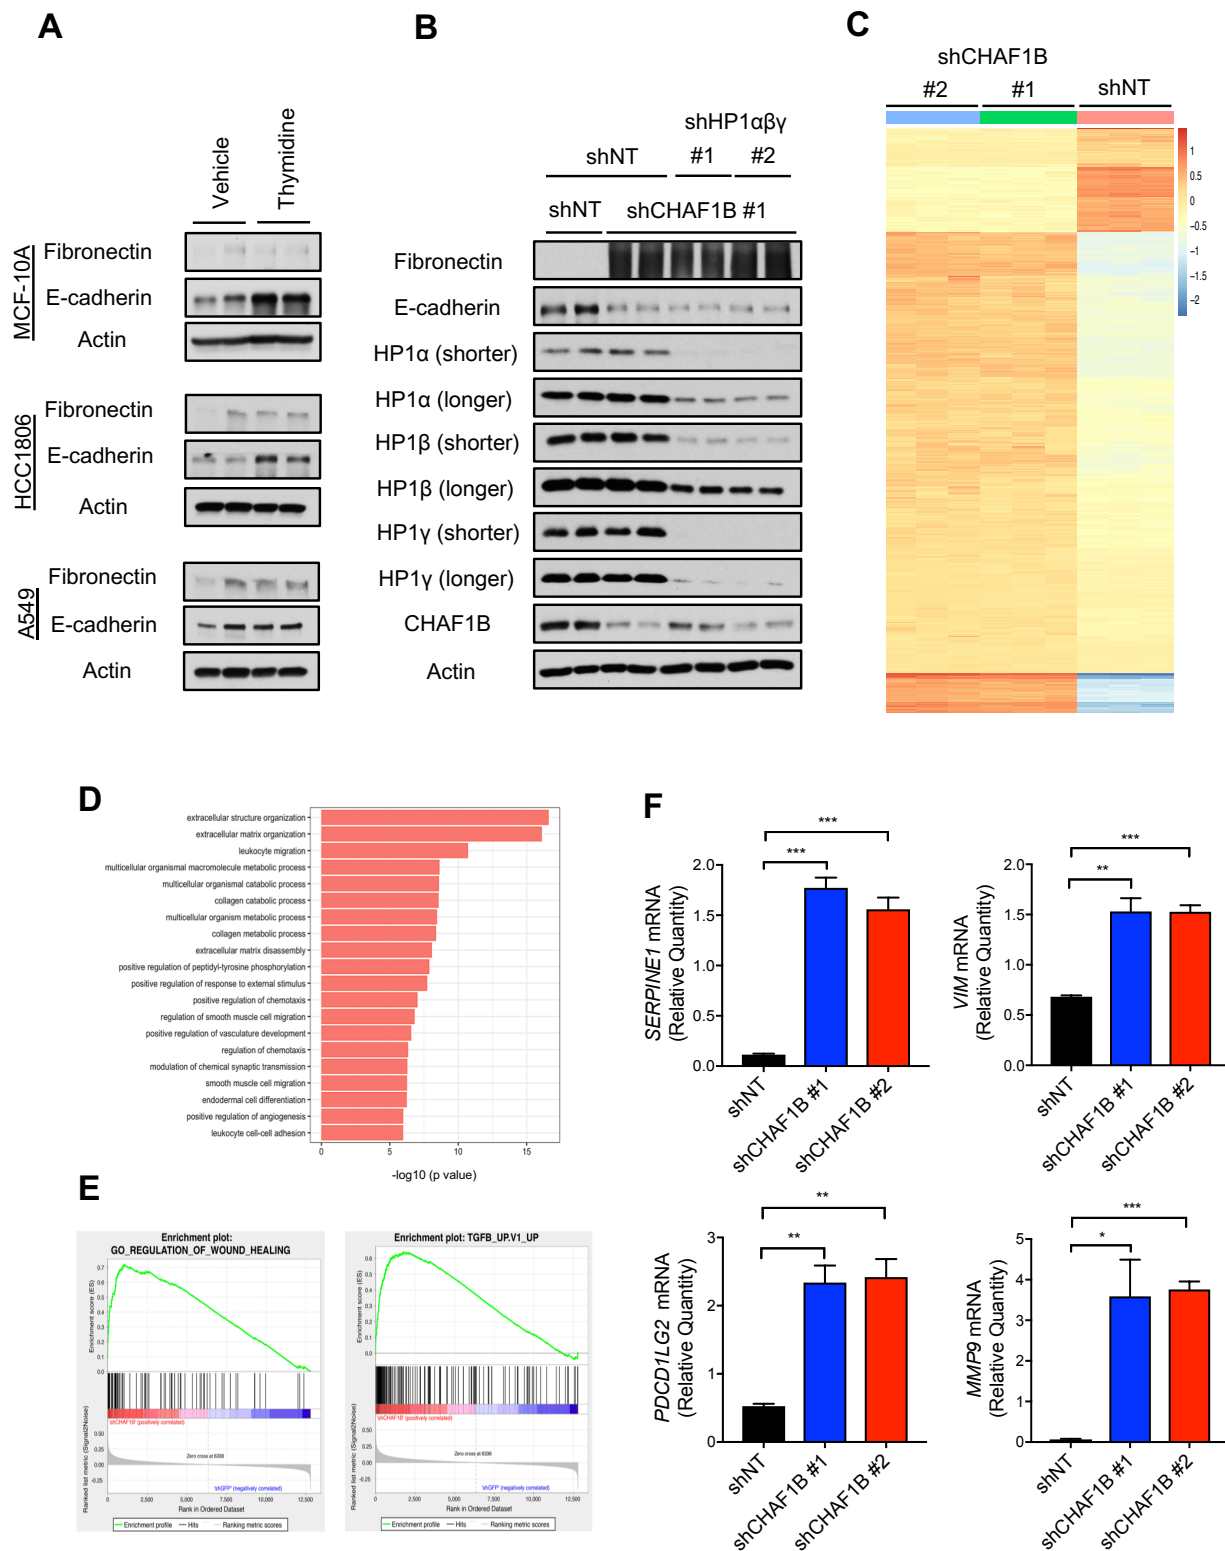

**Figure S7. Suppression of the CAF-1 complex triggers a pro-metastatic transcriptional reprogramming (related to Figure 7)**

(A) EMT induction determined by protein levels of the mesenchymal marker fibronectin and the epithelial marker E-cadherin in MCF-10A, HCC1806 and A549 treated with thymidine for 7 days; representative images (n = 4).

(B) Induction of EMT determined by protein levels of the mesenchymal marker fibronectin and the epithelial marker E-cadherin in MCF-10A with CHAF1B knockdown as well as HP1 knockdown for 10 days; “shorter” and “longer” indicates shorter/longer film exposures, representative images (n = 4).

(C-E) Summary of RNA-seq analysis in MCF-10A with CHAF1B knockdown for 3 days (n=3): a heatmap representation of differentially expressed genes (up regulated genes are indicated with red and down regulated genes are indicated with blue) (C), GSEA analysis of the > 2-fold changed mRNAs (D), GSEA enrichment plots for the wound healing and TGFβ GO-term gene sets (E).

(F) Relative mRNA levels of *SERPINE1*, *VIM*, *MMP9* and *PDCD1LG2* evaluated by qPCR in MCF-10A with CHAF1B knockdown for 3 days (n = 3). All values are expressed as mean ± SEM (\*p < 0.05, \*\*p < 0.01, \*\*\*p < 0.001).

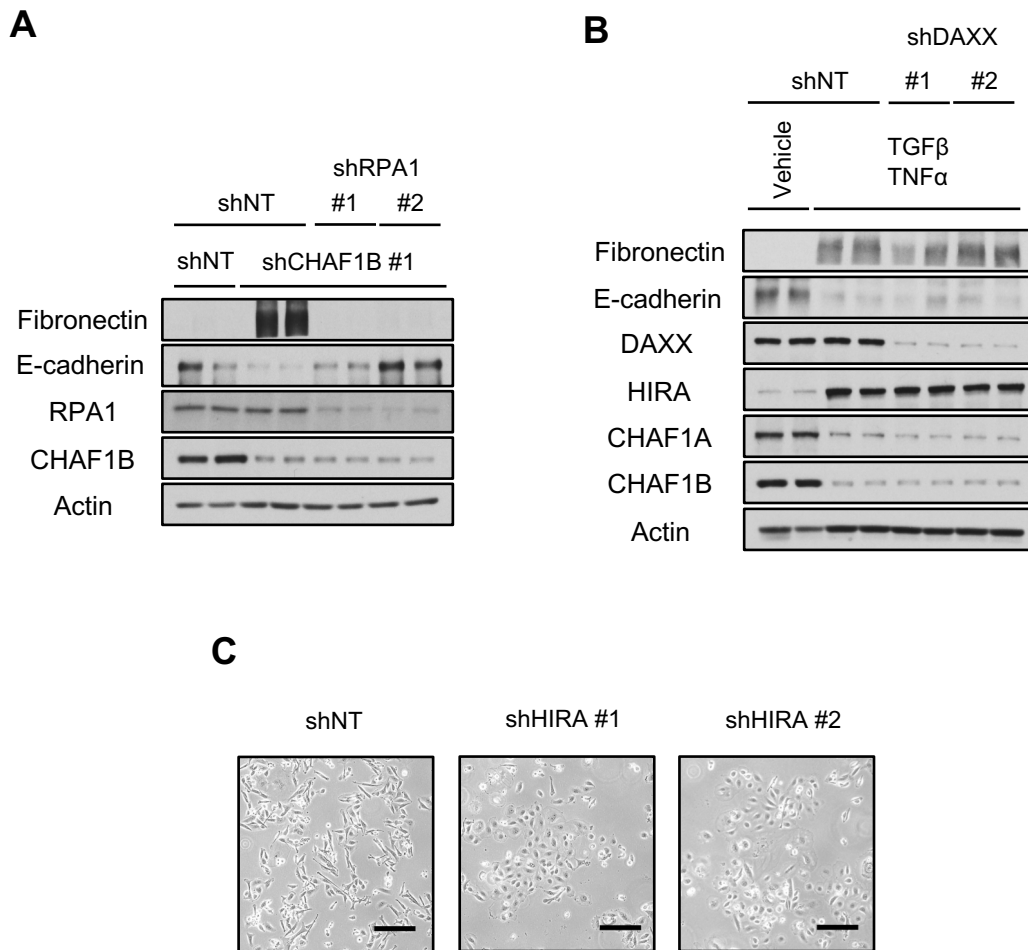

**Figure S8. DAXX does not mediate the pro-metastatic effects of CAF-1 suppression (related to Figure 8)**

(A and B) EMT induction determined by the protein levels of the mesenchymal marker fibronectin and the epithelial marker E-cadherin in MCF-10As with both CHAF1B and RPA1 knockdown (A), and in MCF-10As with DAXX knockdown treated with TGF $\beta$  + TNF $\alpha$  for 5 days (B); representative images (n = 4).

(C) Morphology of LM2 cells with HIRA knockdown; representative images (n = 4), scale bar = 200  $\mu$ m.

**Table S5. Human primers used for mutagenesis, related to STAR Methods**

| Target                                                                |         | Primer Sequence                                                     |
|-----------------------------------------------------------------------|---------|---------------------------------------------------------------------|
| <i>CHAF1B</i><br>T195C/C204A                                          | Forward | AACGCACAACATTGACTGCTTTGGTGTGACGAGCAAGATTGG                          |
|                                                                       | Reverse | CCAATCTTGCTCGTCACACCAAAGCAGTCAATGTTGTGCGTT                          |
| <i>CHAF1B</i><br>C198T/C207T<br>(after<br>T195C/C204A)                | Forward | GAGAAAAACGCACAACATTAAGTCTTTAGTATGACGAGCAAGATTGG                     |
|                                                                       | Reverse | CCAATCTTGCTCGTCATACTAAAGCAGTTAATGTTGTGCGTTTTTCTC                    |
| <i>CHAF1B</i><br>T192A/A201G<br>(after<br>T95C/C198T/<br>C204A/C207T) | Forward | CCAGTTGGAGAAAAACGCACAACATTAAGTCTTAGTGTGTCGAGCAAGATTGGACAAAATTCCAC   |
|                                                                       | Reverse | GTGGAATTTTTGTCCAATCTTGCTCGACACACTAAGGCAGTTAATGTGTGCGTTTTTCTCCAAGTGG |
| <i>Sp1</i> T453A                                                      | Forward | CCCCACTGTTGGTGCCCGGATGATGATGG                                       |
|                                                                       | Reverse | CCATCATCATCCGGGCACCAACAGTGGGG                                       |
| <i>Sp1</i> T453E                                                      | Forward | TTGGGCCCCACTGTTGGCTCCCGGATGATGATGGGAC                               |
|                                                                       | Reverse | GTCCCATCATCATCCGGGAGCCAACAGTGGGGCCCAA                               |
| <i>Sp1</i> T739A                                                      | Forward | AGGGCTGAAGGAGCGGCAGTGCCACTG                                         |
|                                                                       | Reverse | CAGTGGCACTGCCGCTCCTTCAGCCCT                                         |
| <i>Sp1</i> T739E                                                      | Forward | GGTAATAAGGGCTGAAGGCTCGGCAGTGCCACTGCCTTC                             |
|                                                                       | Reverse | GAAGGCAGTGGCACTGCCGAGCCTTCAGCCCTTATTACC                             |

**Table S6. Human primers used for gene expression qPCR analysis, related to STAR methods**

| Gene            |         | Primer Sequence         |
|-----------------|---------|-------------------------|
| <i>ACTB</i>     | Forward | CATGTACGTTGCTATCCAGGC   |
|                 | Reverse | CTCCTTAATGTCACGCACGAT   |
| <i>TBP</i>      | Forward | GAGCCAAGAGTGAAGAACAGTC  |
|                 | Reverse | GCTCCCCACCATATTCTGAATCT |
| <i>CHAF1A</i>   | Forward | CAGCCAGACAGTCTTGTGGAC   |
|                 | Reverse | GTCGTTCTGAATGGCCTTCAA   |
| <i>CHAF1B</i>   | Forward | GCGTGGACACCAATGTCAG     |
|                 | Reverse | GCTCCGGCTCCTTGTTATCAT   |
| <i>ZEB1</i>     | Forward | TTACACCTTTGCATACAGAACCC |
|                 | Reverse | TTTACGATTACACCCAGACTGC  |
| <i>SNAI1</i>    | Forward | ACAAGCACCAAGAGTCCG      |
|                 | Reverse | ATGGCAGTGAGAAGGATGTG    |
| <i>FOSL1</i>    | Forward | GCCCACTGTTTCTCTTGAGC    |
|                 | Reverse | GGAGATAGGGTTGGGTGGAT    |
| <i>SOX9</i>     | Forward | ACTTGCACAACGCCGAG       |
|                 | Reverse | CTGGTACTTGTAATCCGGGTG   |
| <i>MMP9</i>     | Forward | CGAACTTTGACAGCGACAAG    |
|                 | Reverse | CACTGAGGAATGATCTAAGCCC  |
| <i>SERPINE1</i> | Forward | GTGGACTTTTCAGAGGTGGAG   |
|                 | Reverse | GAAGTAGAGGGCATTACCAG    |
| <i>VIM</i>      | Forward | CGTGAATACCAAGACCTGCTC   |
|                 | Reverse | GGAAAAGTTTGGAAAGAGGCAG  |
| <i>PDCD1LG2</i> | Forward | GGACGAAGGACAGTACCAATG   |
|                 | Reverse | GCTCTACCTCATCTGTTTCTGG  |

**Table S7. Human primers used for ChIP-qPCR analysis, related to STAR methods**

| Target                     |         | Primer Sequence         |
|----------------------------|---------|-------------------------|
| <i>ZEB1</i><br>promoter    | Forward | AGGCGTGGGACTGATGGTAG    |
|                            | Reverse | TGGCTGATTCTCCCTGTACC    |
| <i>SNA11</i><br>promoter   | Forward | CGCTCCGTAAACACTGGATAA   |
|                            | Reverse | GCACATCACTGGGGAGGAAG    |
| <i>SOX9</i><br>promoter    | Forward | CAGGAGGCAAAGACCAAAC     |
|                            | Reverse | CACATCGACCTTGAGCTCTG    |
| <i>ZNF268</i><br>gene body | Forward | CCTGTTGATCCTGCTCTTCTG   |
|                            | Reverse | GAATAAAGACCCCTTGGATTCAG |
| <i>POLQ</i><br>gene body   | Forward | GCAGTCCCTTACTGGCAATG    |
|                            | Reverse | TGGAGAGTGAGAACCCCTTC    |
| <i>DROSHA</i><br>gene body | Forward | TCCATAAAAGGGCAGTTTCAC   |
|                            | Reverse | ATGCTTCTCCCATCCTGTTG    |
